# Supplementary material for: Mitochondrial ROS promote mitochondrial dysfunction and inflammation in ischemic acute kidney injury by disrupting TFAM-mediated mtDNA maintenance
Source: Theranostics. 2021 Jan 1;11(4):1845–63. doi: 10.7150/thno.50905 (PMC7778599; doi:10.7150/thno.50905)
Supplement: Supplementary file 1 — Supplementary figures and tables. [file thnov11p1845s1.pdf]

## Supplementary Materials

### **Mitochondrial ROS promote mitochondrial dysfunction and inflammation in ischemic acute kidney injury by disrupting TFAM-mediated mtDNA maintenance**

Meng Zhao <sup>a#</sup>, Yizhuo Wang <sup>a#</sup>, Ling Li <sup>b</sup>, Shuyun Liu <sup>a</sup>, Chengshi Wang <sup>a</sup>, Yujia Yuan <sup>a</sup>,  
Guang Yang <sup>c</sup>, Younan Chen <sup>a</sup>, Jingqiu Cheng <sup>a</sup>, Yanrong Lu <sup>a</sup>, Jingping Liu <sup>a\*</sup>

<sup>a</sup> Key Laboratory of Transplant Engineering and Immunology, National Clinical Research Center for Geriatrics, Frontiers Science Center for Disease-related Molecular Network, West China Hospital, Sichuan University, Chengdu, China

<sup>b</sup> Department of Nephrology, West China Hospital, Sichuan University, Chengdu, China

<sup>c</sup> Animal Center, West China Hospital, Sichuan University, Chengdu, China.

<sup>#</sup> Co-first authors: These authors contributed equally to the authorship of this article

\*Corresponding Authors: Jingping Liu

Address: Key Laboratory of Transplant Engineering and Immunology, West China Hospital, Sichuan University, No. 1 Keyuan 4<sup>th</sup> Road, Gaopeng Ave, Chengdu 610041, China

Tel: +86-28-85164029, Fax: +86-28-85164030

E-mail: liujingping@scu.edu.cn

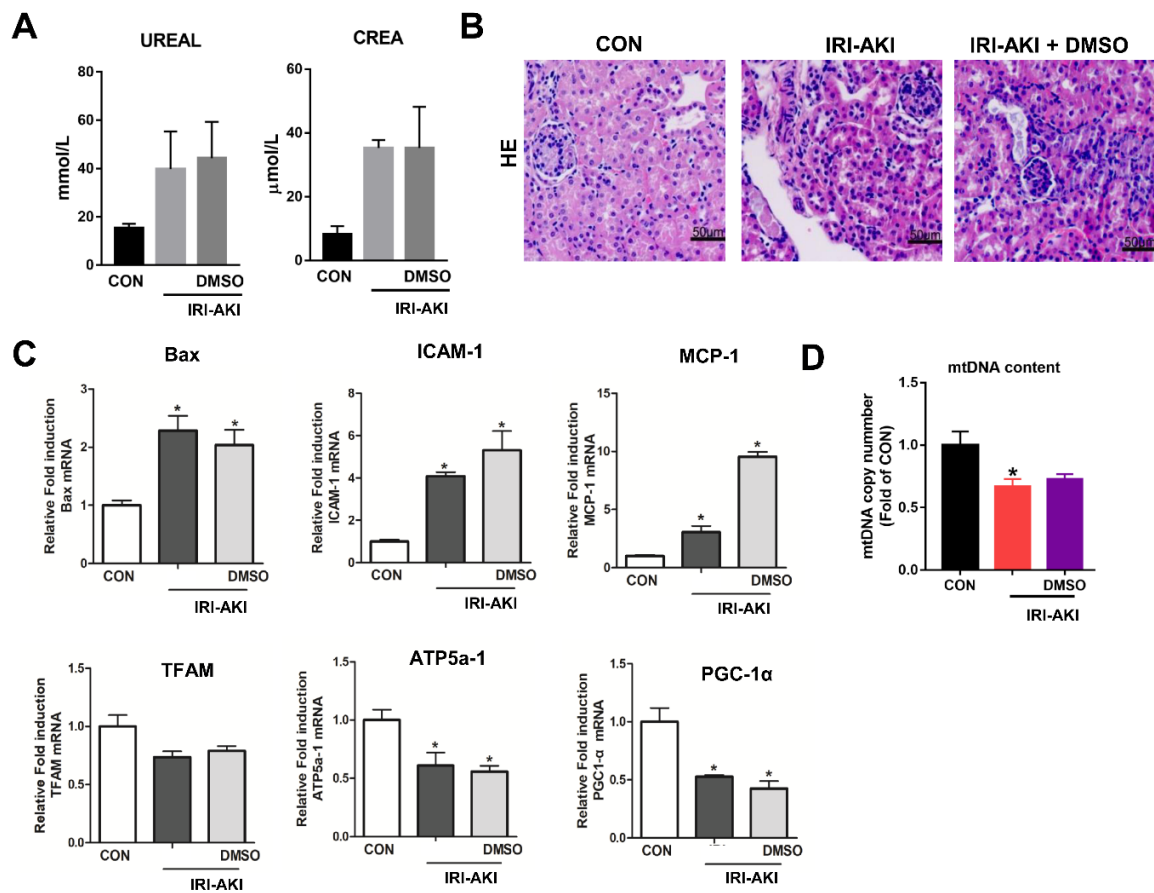

**Figure S1.** The vehicle (DMSO/PBS) alone had no influence on renal lesions in IRI-AKI mice. (A) Serum CREA and UREA concentrations of mice on day 5 after IRI-AKI (n = 6; \*p < 0.05 vs. CON group). (B) Representative micrographs of renal H&E staining in mice with different treatments. (C) Real-time PCR analysis of Bax, ICAM-1, MCP-1, TFAM, ATP5a-1, and PGC-1α mRNA levels in kidneys of mice on day 5 after IRI-AKI (n = 3; \*p < 0.05 vs. CON group). (D) mtDNA copy number in kidneys of mice on day 5 after IRI-AKI (n = 3; \*p < 0.05 vs. CON group).

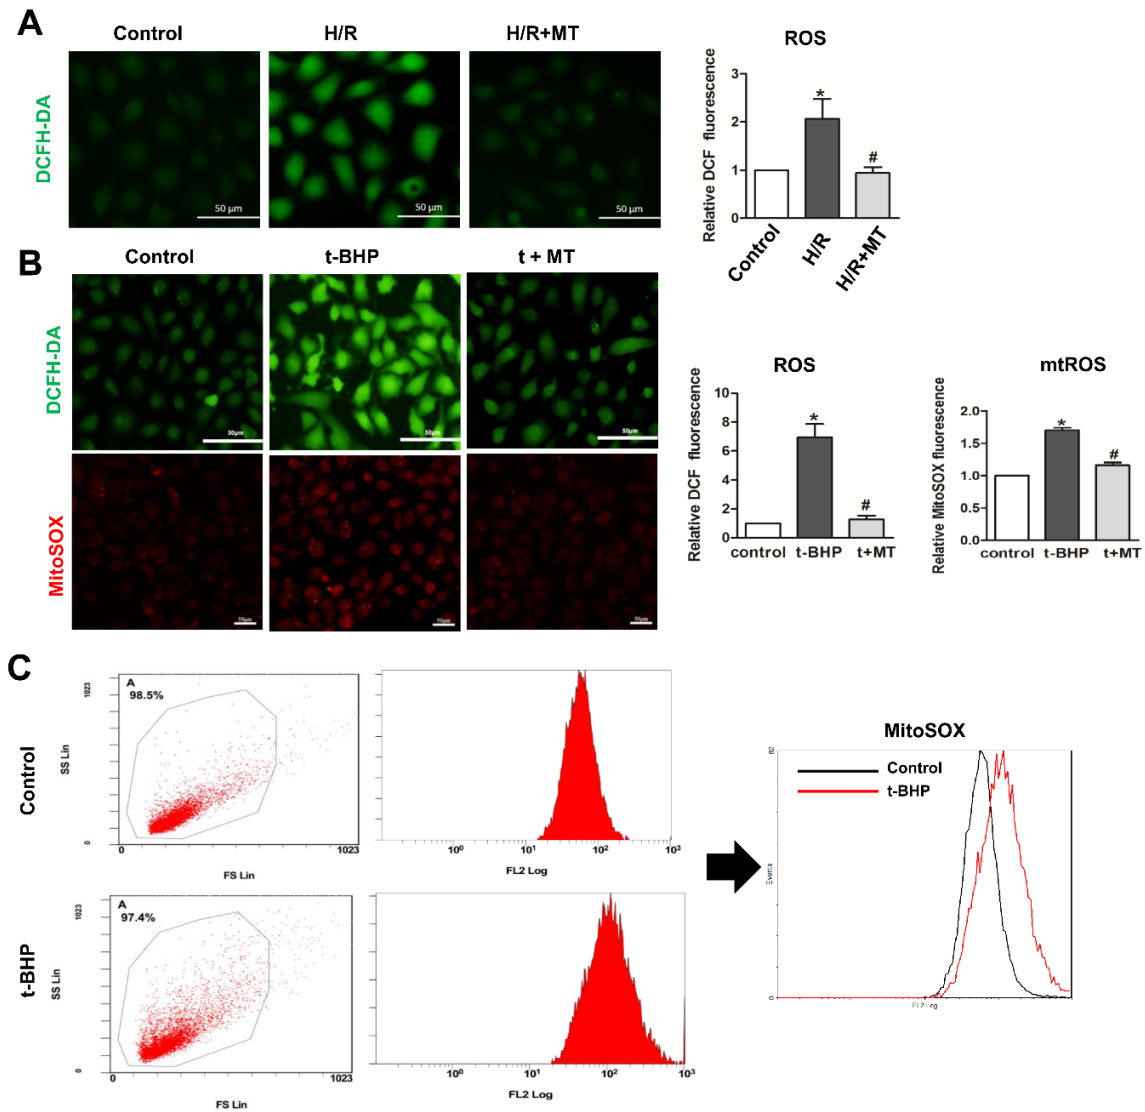

**Figure S2.** Measurement of ROS production in HK2 cells under different stress conditions.

(A) Determination of intracellular ROS in the HK2 cells under H/R conditions using the DCFH-DA staining (scale bar = 50  $\mu$ m). (B) Determination of intracellular ROS and mtROS in HK2 cells under t-BHP conditions with the DCFH-DA and MitoSOX staining (Scale bar = 50  $\mu$ m). (C) Determination of mtROS level in HK2 cells under t-BHP conditions using flow cytometry with MitoSOX staining.

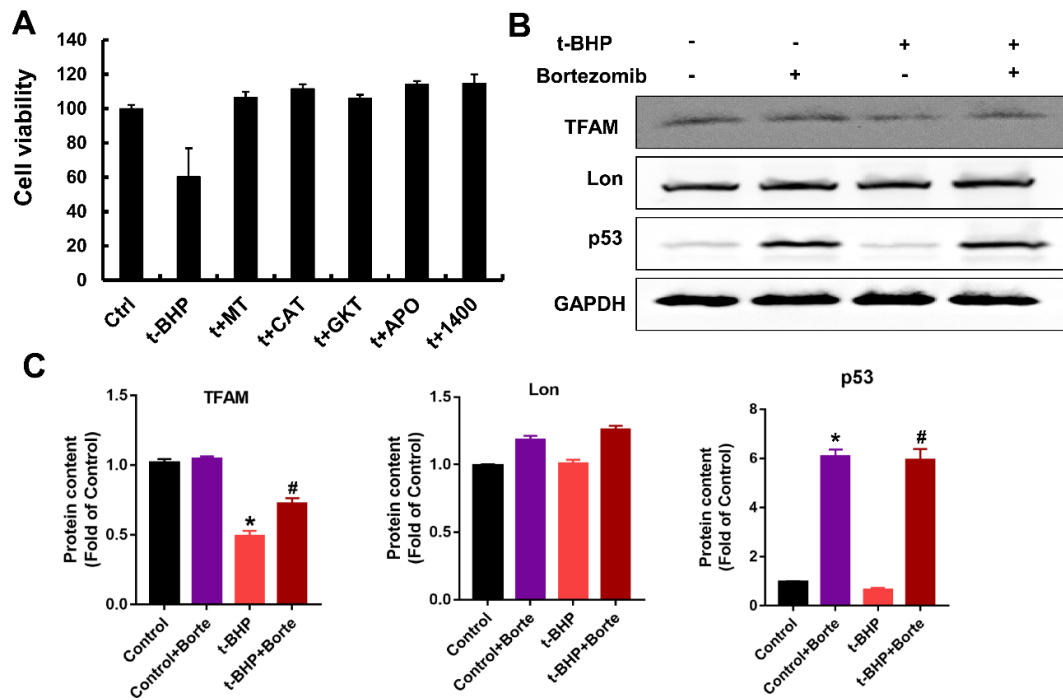

**Figure S3.** TFAM degradation was enhanced in HK2 cells under oxidative stress. (A) Cell viability was determined by CCK8 assay (n = 3; \*p < 0.05 vs. Control group; #p < 0.05 vs. t-BHP group). (B) Western blotting of TFAM, Lon, and p53 proteins in HK2 cells under t-BHP conditions with or without bortezomib treatment. (C) Quantitative analysis of protein expression detected by western blotting (n = 3; \*p < 0.05 vs. Control group; #p < 0.05 vs. t-BHP group).

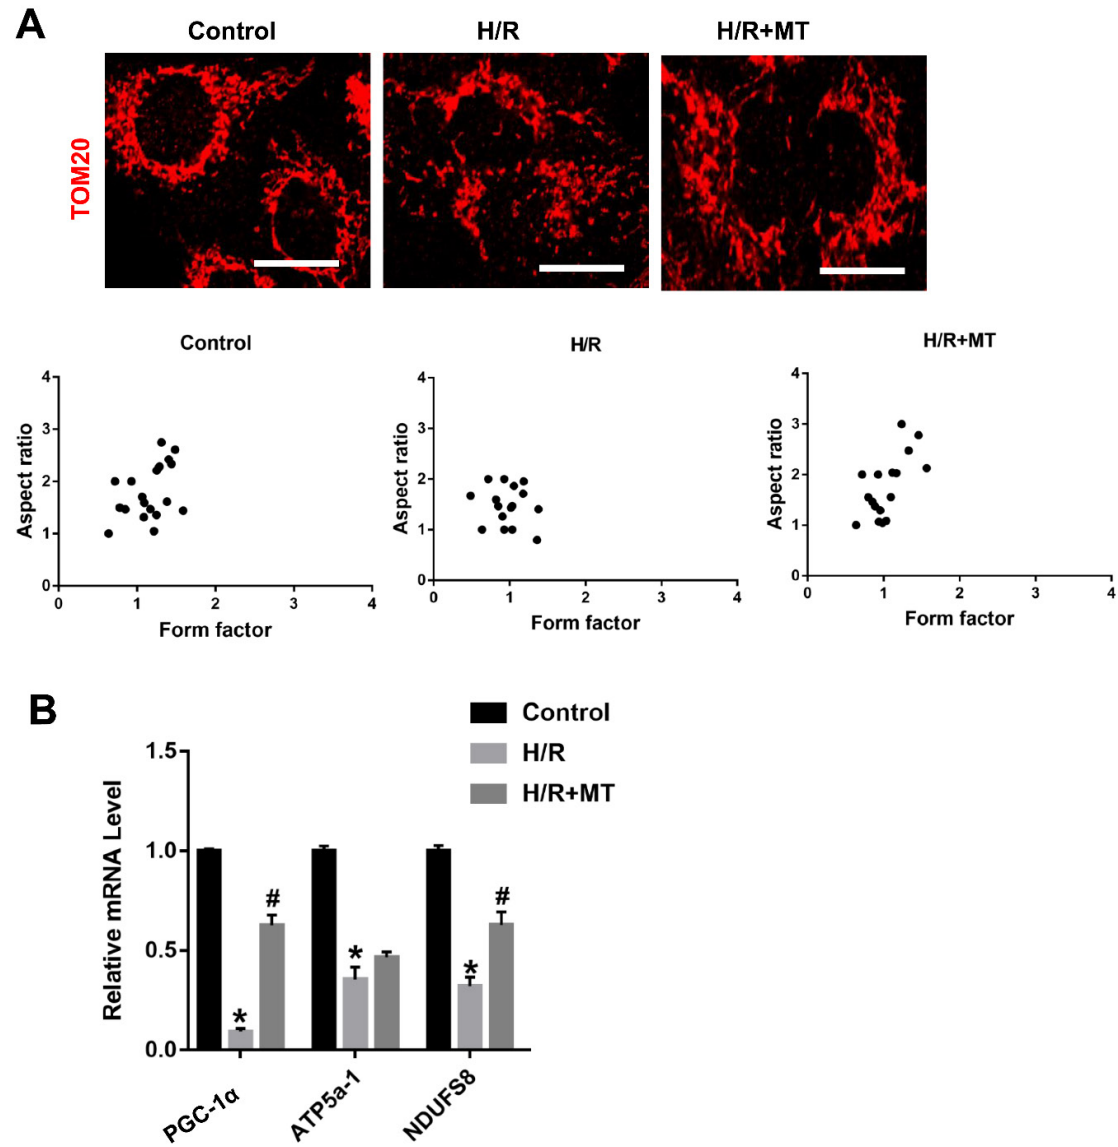

**Figure S4.** (A) Observation of mitochondria and quantification of mitochondrial length in HK2 cells under H/R conditions. HK2 cells were treated with or without MT and then stained with anti-TOM20. (B) Real-time PCR analysis of PGC-1 $\alpha$ , ATP5a-1, and NDUF58 mRNA levels in HK2 cells under H/R conditions with or without MT treatment ( $n = 3$ ; \* $p < 0.05$  vs. Control group; # $p < 0.05$  vs. H/R group).

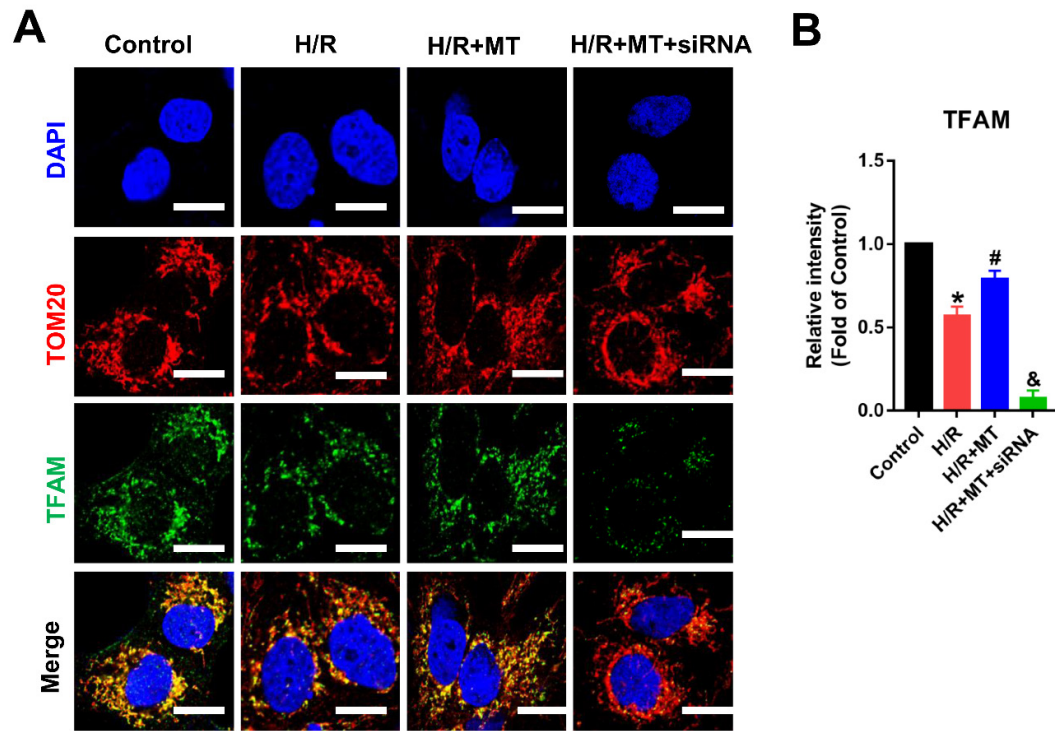

**Figure S5.** (A) Double-IF staining of TOM20 (red) and TFAM (green) in the HK2 cells under H/R conditions with or without TFAM siRNA treatment (scale = 10  $\mu$ m). (B) Quantitative analysis of TFAM protein expression in the HK2 cells (n = 6; \*p < 0.05 vs. Control group; #p < 0.05 vs. H/R group; &p < 0.05 vs. MT group).

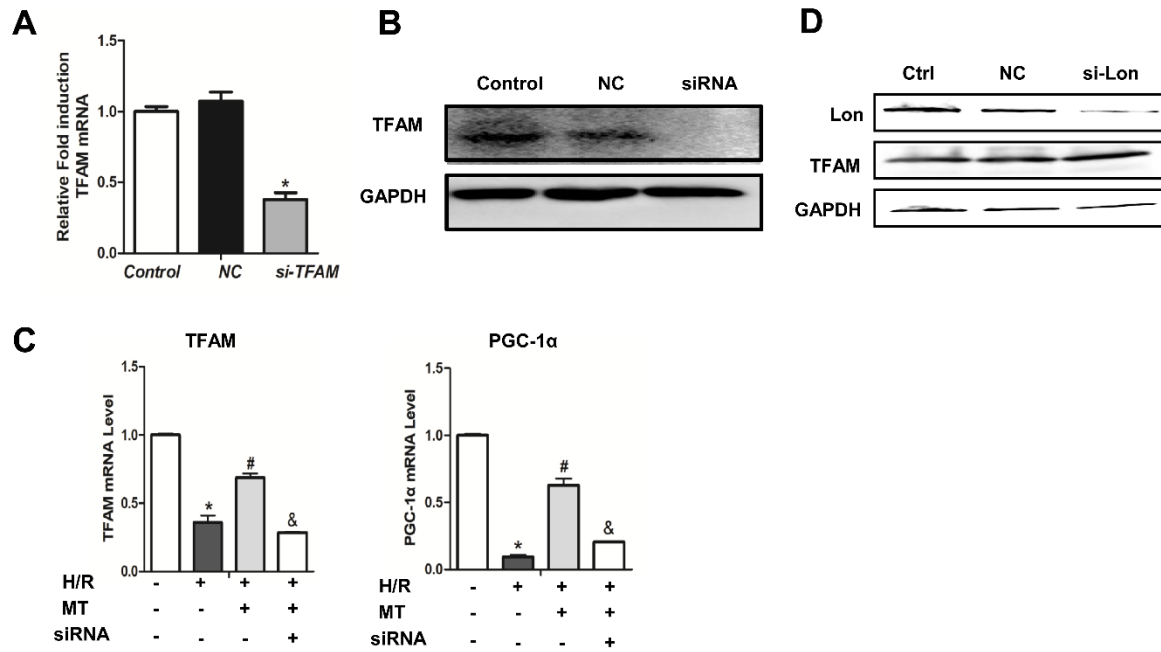

**Figure S6.** TFAM deficiency abolished the protective role of mtROS scavenger in the HK2 cells. (A) Real-time PCR analysis of TFAM mRNA levels in HK2 cells. (B) Western blotting analysis of TFAM protein levels in the HK2 cells at 48 h after transfection. (C) Real-time PCR analysis of TFAM and PGC-1 $\alpha$  mRNA levels in HK2 cells under H/R conditions (n = 3; \*p < 0.05 vs. Control group; #p < 0.05 vs. H/R group; &p < 0.05 vs. MT group).

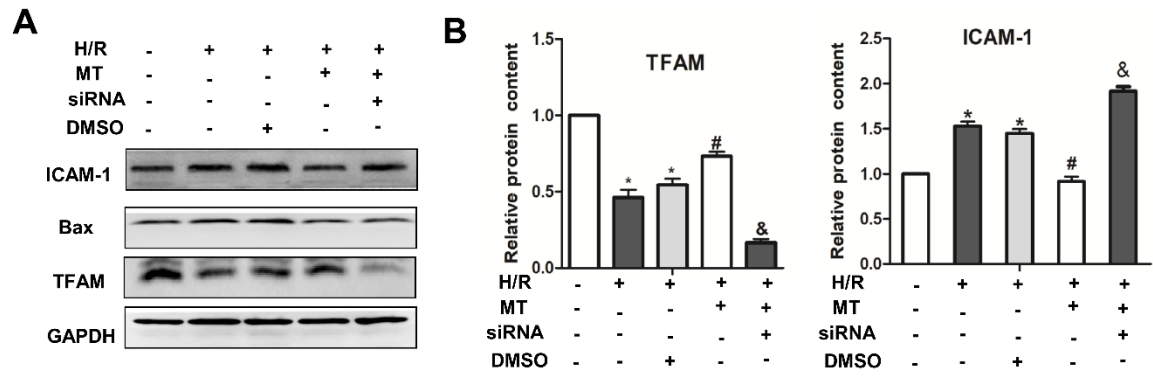

**Figure S7.** Loss of TFAM under oxidative stress induced cytokine production in HK2 cells.

(A) Western blotting analysis of ICAM-1, Bax, and TFAM protein levels in HK2 cells under H/R conditions with various treatments. (B) Quantitative analysis of ICAM-1 and TFAM protein expression detected by western blotting (n = 3; \*p < 0.05 vs. Control group; #p < 0.05 vs. H/R group; &p < 0.05 vs. MT group).

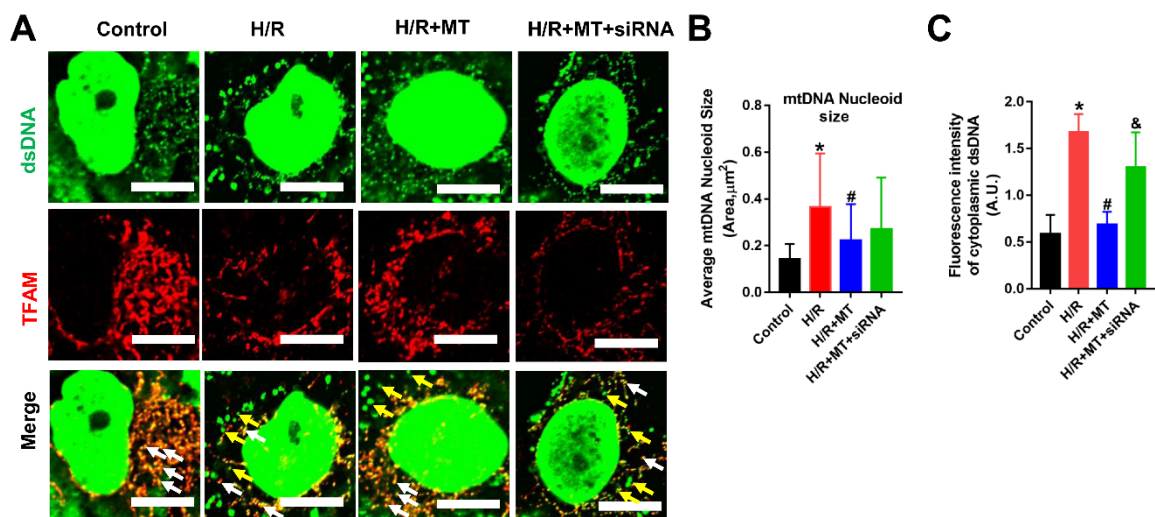

**Figure S8.** (A) Double-IF staining of TFAM (red) and dsDNA (green) in HK2 cells under H/R conditions with various treatments (scale bar = 10  $\mu\text{m}$ ). (B) Average size of mtDNA nucleoid in HK2 cells of different groups (n = 20 cells; \*p < 0.05 vs. Control group; #p < 0.05 vs. H/R group). (C) Quantification of cytoplasmic dsDNA (yellow arrows) intensity in HK2 cells (n = 16 cells; \*p < 0.05 vs. Control group; #p < 0.05 vs. H/R group; &p < 0.05 vs. MT group).

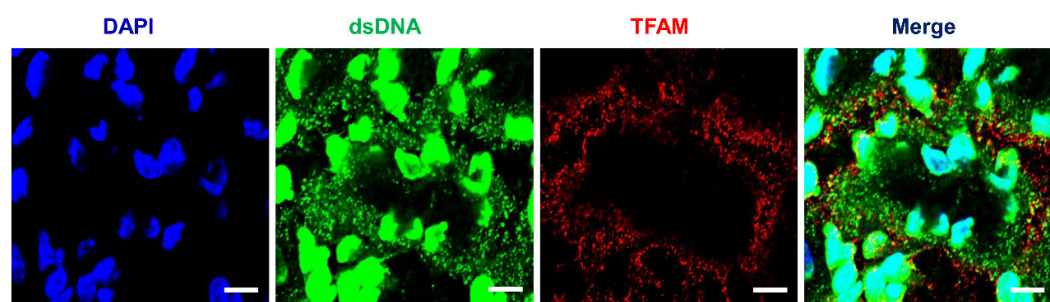

**Figure S9.** Representative images of the TFAM (red), dsDNA (green), and DAPI costaining in kidney of normal control mice (scale bar = 10 μm).

**Table S1** Primers used in Real-time PCR assay

| Gene           | Sequence 5'-3'                                     | Species |
|----------------|----------------------------------------------------|---------|
| TFAM           | AGCTCAGAACCCAGATGCAA<br>CCGCCCTATAAGCATCTTGA       | Human   |
| PGC1- $\alpha$ | TGCTGAAGAGGCAAGAGACA<br>CACACACGCACACTCCATC        |         |
| NDUFS8         | CATCTACTGCGGCTTCTGC<br>GGGCGTCACCGATAACAAGT        |         |
| ATP5a-1        | AGAGGACAGGAGCCATTGTG<br>TCAGACCAACTCGCCTACG        |         |
| UQCRC1         | CAGTCCTCTCAGCCCCTTG<br>CCGATTCTTTGTTCCCTTGA        |         |
| IL-1 $\beta$   | TGGCAGAAAGGGAACAGAAA<br>CTGGCTGATGGACAGGAGAT       |         |
| TNF- $\alpha$  | TGCTGCACTTTGGAGTGATCG<br>TGTCACTCGGGGTTCGAGAAG     |         |
| GAPDH          | ACCACAGTCCATGCCATCAC<br>TCCACCACCCTGTTGCTGTA       |         |
| TFAM           | CACCCAGATGCAAACTTTCAG<br>CTGCTCTTTATACTTGCTCACAG   |         |
| PGC1- $\alpha$ | CACCAAACCCACAGAAAACAG<br>GGGTCAGAGGAAGAGATAAAGTTG  |         |
| ATP5a-1        | CATTGGTGATGGTATTGCGC<br>TCCCAAACACGACAACCTCC       |         |
| Bax            | TGGAGATGAACTGGACAGCA<br>TGAAGTTGCCATCAGCAAAC       | Mouse   |
| MCP-1          | AGTTGACCCGTAAATCTGAAGC<br>GTGGTTGTGGAAAAGGTAGTGG   |         |
| ICAM-1         | ACCCAACTGGAAGCTGTTTG<br>CACACTCTCCGGAAACGAAT       |         |
| TNF- $\alpha$  | CCAGGAGAAAGTCAGCCTCCT<br>TCATACCAGGGCTTGAGCTCA     |         |
| GAPDH          | CAGATCCACAACGGATATATTGGG<br>CATGACAACCTTGGCATTGTGG |         |

**Table S2** Primers used in mtDNA copy number assay

| <b>Gene</b> | <b>Sequence 5'-3'</b>  | <b>Species</b> |
|-------------|------------------------|----------------|
| hB2M        | TG TTCCTGCTGGG TAGCTCT | Human          |
|             | CCTCCATGATGCTGCTTACA   |                |
| mtND1       | CAC TTTCCACACAGACATCA  | Mouse          |
|             | TGGTTAGGCTGGTGT TAGGG  |                |
| COX2        | ATAACCGAGTCGTTCTGCCAAT |                |
|             | TTTCAGAGCATTGGCCATAGAA |                |
| Rsp18       | TGTGTTAGGGGACTGGTGGACA |                |
|             | CATCACCCACTTACCCCCAAAA |                |
